# Supplementary material for: Acute mental health service use following onset of the COVID-19 pandemic in Ontario, Canada: a trend analysis
Source: PubMed Central journal article supplement — CMAJ Open. 2021 Nov 16;9(4):E988–97. doi: 10.9778/cmajo.20210100 (PMC8598241; doi:10.9778/cmajo.20210100), 2021-11-16
Supplement: open-2021-0100-1-at.pdf [file open-2021-0100-1-at.pdf]

**Appendix 1 (as supplied by authors).**

**Mental Health Diagnostic Codes and Disease Groupings**

| Category                                                    | ICD-9-CM code (OMHRS)                                                                                                                         | ICD-10-CA (DAD/NACRS)                                                                                        |
|-------------------------------------------------------------|-----------------------------------------------------------------------------------------------------------------------------------------------|--------------------------------------------------------------------------------------------------------------|
| <b>Any mental health and addictions</b>                     | Any OMHRS record (including missing, except for 290.x, 294.x in primary diagnosis). Excluded if primary diagnosis missing and provisional=17. | A primary diagnosis of F06-F99 any diagnosis X60-X84, Y10-Y19, Y28 when the primary diagnosis is not F06-F99 |
| <b>Substance-Related and Addictive Disorders</b>            | 291.x (all 291 codes), 292.x (all 292 codes), 303.x (all 303 codes), 304.x (all 304 codes), 305.x. Provisional=16                             | A primary diagnosis of F10-19, F55                                                                           |
| <b>Schizophrenia Spectrum and Other Psychotic Disorders</b> | 293.81/82, 295.x (all 295 codes), 297.x (all 297 codes), 298.x (all 298 codes). Provisional=2                                                 | A primary diagnosis of F06.0-2, F20, F22-F29, F53.1                                                          |
| <b>Mood disorders</b>                                       | 293.83, 296.x (all 296 codes), 300.4x, 301.13, 311.x, 625.4. Provisional=3, 4                                                                 | A primary diagnosis of F06.3, F30.x-F34.x, F38.x, F39.x, F53.0                                               |
| <b>Anxiety disorders</b>                                    | 293.84, 300, 300.0x, 300.2x, 309.21, 313.23. Provisional=5                                                                                    | A primary diagnosis of F06.4, F40, F41, F93.0-2, F94.0                                                       |
| <b>Trauma/stressor-related disorders</b>                    | 308.3x, 309, 309.0x, 309.24, 309.28, 309.3x, 309.4x, 309.81, 309.89, 309.9x, 313.89. Provisional=7                                            | A primary diagnosis of F43.x, F94.1, F94.2                                                                   |
| <b>OCD &amp; related disorders</b>                          | 300.3x, 300.7x, 312.39, 698.4x. Provisional=6                                                                                                 | A primary diagnosis of F42.x, F45.2, F63.3                                                                   |
| <b>Personality disorders</b>                                | 301, 301.0x, 301.2x, 301.4x, 301.5x, 301.6x, 301.7x, 301.81-3, 301.89, 301.9x 310.1. Provisional=18                                           | A primary diagnosis of F07.x (all F07 codes), F21, F60, F61, F62, F68, F69                                   |
| <b>Intentional self-injury</b>                              | N/A (DAD/NACRS only)                                                                                                                          | A secondary diagnosis of X60-X84, Y10-Y19, Y28                                                               |

OMHRS=Ontario Mental Health Reporting System, DAD=Discharge Abstract Database, NACRS=National Ambulatory Care Reporting System, OCD=obsessive compulsive disorder, ICD-9-CM=International Classification of Diseases, 9<sup>th</sup> Revision, clinical modification, ICD-10-CA=International Classification of Diseases, 10<sup>th</sup> Revision, with Canadian enhancements
