# Supplementary material for: Acute mental health service use following onset of the COVID-19 pandemic in Ontario, Canada: a trend analysis
Source: PubMed Central journal article supplement — CMAJ Open. 2021 Nov 16;9(4):E988–97. doi: 10.9778/cmajo.20210100 (PMC8598241; doi:10.9778/cmajo.20210100), 2021-11-16
Supplement: open-2021-0100-2-at.pdf [file open-2021-0100-2-at.pdf]

**Appendix 2 (as supplied by authors).**

**eFigure 1.** Flow chart of study inclusion and exclusions for 2020 population in Ontario.

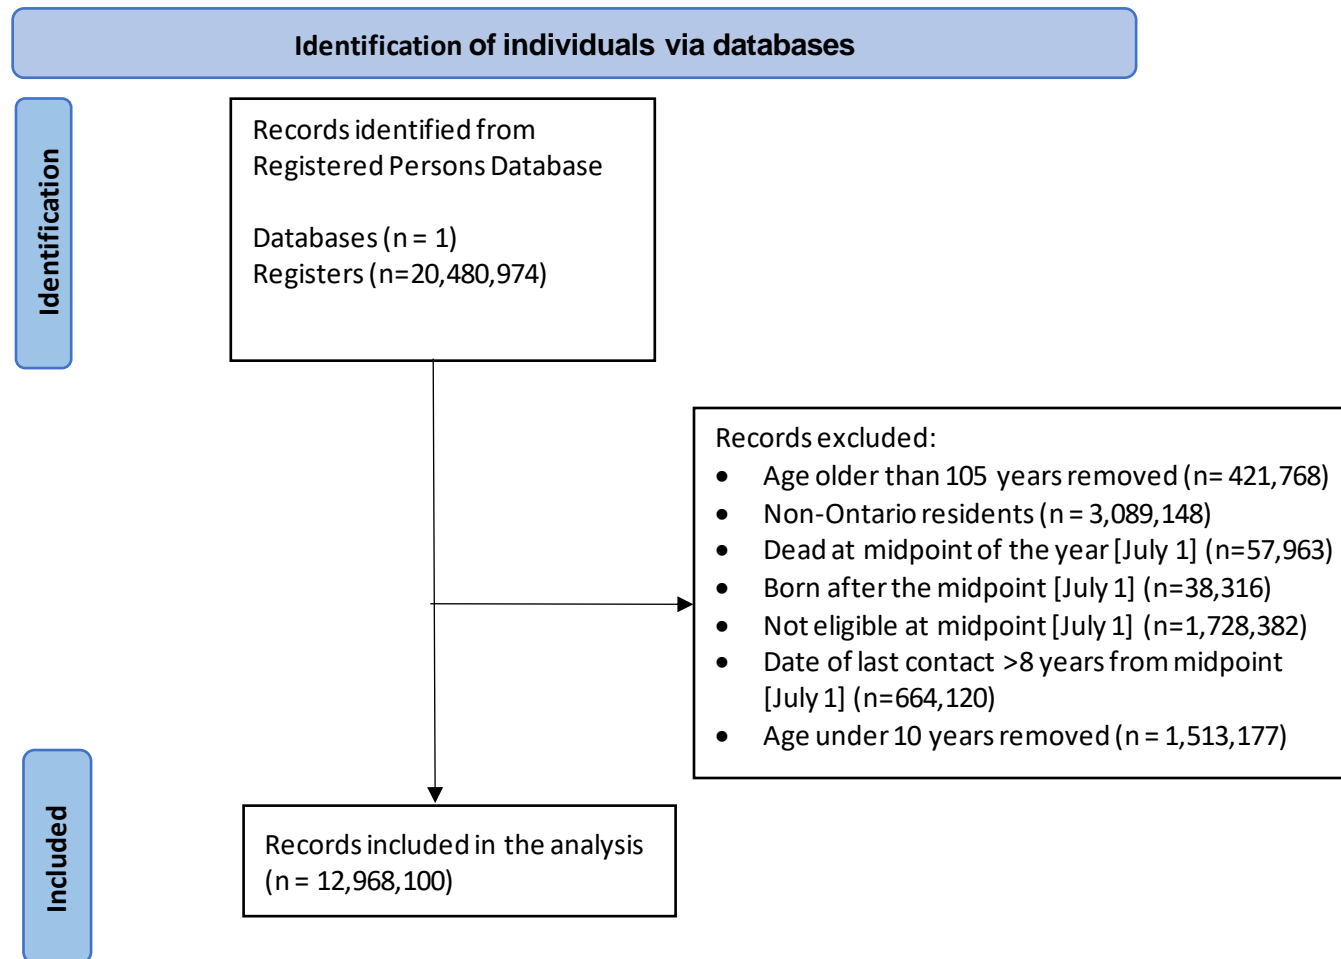

eTable 1: Monthly rates of acute mental health use during the COVID-19 pandemic, April 2020 to March 2021 by sex.

| Age Strata                                              | Apr  | May  | Jun  | Jul  | Aug  | Sept | Oct  | Nov  | Dec  | Jan  | Feb  | Mar  |
|---------------------------------------------------------|------|------|------|------|------|------|------|------|------|------|------|------|
| <b>EMERGENCY DEPARTMENT VISITS, PER 1000 POPULATION</b> |      |      |      |      |      |      |      |      |      |      |      |      |
| <b>MALES</b>                                            |      |      |      |      |      |      |      |      |      |      |      |      |
| 10-13 years                                             | 0.16 | 0.27 | 0.33 | 0.32 | 0.36 | 0.35 | 0.48 | 0.54 | 0.34 | 0.26 | 0.43 | 0.57 |
| 14-17 years                                             | 0.88 | 1.08 | 1.30 | 1.45 | 1.40 | 1.30 | 1.59 | 1.53 | 1.40 | 1.47 | 1.36 | 1.63 |
| 18-21 years                                             | 2.21 | 2.57 | 2.88 | 3.10 | 2.88 | 2.90 | 2.72 | 2.59 | 2.66 | 2.47 | 2.37 | 2.44 |
| 22-24 years                                             | 2.49 | 3.03 | 3.30 | 3.44 | 3.44 | 2.98 | 2.91 | 3.06 | 3.16 | 3.05 | 2.65 | 3.07 |
| 25-44 years                                             | 2.18 | 2.62 | 2.73 | 2.89 | 2.78 | 2.67 | 2.73 | 2.69 | 2.72 | 2.63 | 2.39 | 2.62 |
| 45-64 years                                             | 1.07 | 1.36 | 1.50 | 1.64 | 1.55 | 1.44 | 1.38 | 1.37 | 1.30 | 1.27 | 1.14 | 1.31 |
| 65-105 years                                            | 0.39 | 0.54 | 0.61 | 0.68 | 0.65 | 0.60 | 0.59 | 0.56 | 0.54 | 0.53 | 0.45 | 0.55 |
| <b>FEMALES</b>                                          |      |      |      |      |      |      |      |      |      |      |      |      |
| 10-13 years                                             | 0.43 | 0.59 | 0.60 | 0.76 | 0.83 | 0.94 | 1.17 | 1.23 | 1.06 | 1.08 | 1.28 | 1.61 |
| 14-17 years                                             | 1.83 | 2.22 | 2.62 | 3.01 | 2.95 | 3.41 | 3.75 | 3.68 | 3.09 | 3.45 | 3.10 | 4.22 |
| 18-21 years                                             | 2.51 | 3.14 | 3.91 | 4.39 | 4.29 | 3.95 | 3.78 | 3.77 | 3.72 | 3.67 | 3.56 | 3.81 |
| 22-24 years                                             | 1.87 | 2.69 | 3.05 | 3.45 | 3.40 | 3.24 | 3.07 | 3.22 | 2.97 | 3.05 | 2.81 | 3.02 |
| 25-44 years                                             | 1.33 | 1.75 | 1.85 | 2.10 | 2.04 | 1.90 | 1.94 | 1.90 | 1.82 | 1.89 | 1.69 | 1.89 |
| 45-64 years                                             | 0.71 | 0.92 | 1.00 | 1.12 | 1.13 | 1.02 | 0.98 | 0.95 | 0.86 | 0.91 | 0.80 | 1.00 |
| 65-105 years                                            | 0.36 | 0.50 | 0.49 | 0.57 | 0.60 | 0.56 | 0.56 | 0.50 | 0.48 | 0.45 | 0.46 | 0.52 |
| <b>HOSPITALIZATIONS, PER 1000 POPULATION</b>            |      |      |      |      |      |      |      |      |      |      |      |      |
| <b>MALES</b>                                            |      |      |      |      |      |      |      |      |      |      |      |      |
| 10-13 years                                             | 0.05 | 0.08 | 0.10 | 0.06 | 0.09 | 0.07 | 0.17 | 0.12 | 0.12 | 0.09 | 0.11 | 0.16 |
| 14-17 years                                             | 0.29 | 0.34 | 0.48 | 0.49 | 0.41 | 0.38 | 0.48 | 0.54 | 0.51 | 0.46 | 0.44 | 0.55 |
| 18-21 years                                             | 0.63 | 0.66 | 0.83 | 0.93 | 0.81 | 0.73 | 0.77 | 0.76 | 0.82 | 0.74 | 0.69 | 0.77 |
| 22-24 years                                             | 0.72 | 0.94 | 0.99 | 1.01 | 0.86 | 0.88 | 0.78 | 0.86 | 1.06 | 0.85 | 0.81 | 0.88 |
| 25-44 years                                             | 0.63 | 0.69 | 0.77 | 0.82 | 0.76 | 0.75 | 0.78 | 0.77 | 0.82 | 0.75 | 0.65 | 0.78 |
| 45-64 years                                             | 0.31 | 0.37 | 0.44 | 0.47 | 0.46 | 0.43 | 0.43 | 0.39 | 0.42 | 0.40 | 0.35 | 0.43 |
| 65-105 years                                            | 0.16 | 0.19 | 0.22 | 0.22 | 0.24 | 0.21 | 0.22 | 0.21 | 0.21 | 0.18 | 0.16 | 0.22 |
| <b>FEMALES</b>                                          |      |      |      |      |      |      |      |      |      |      |      |      |
| 10-13 years                                             | 0.12 | 0.23 | 0.25 | 0.31 | 0.29 | 0.39 | 0.54 | 0.53 | 0.52 | 0.39 | 0.50 | 0.58 |
| 14-17 years                                             | 0.77 | 0.90 | 1.08 | 1.23 | 1.14 | 1.29 | 1.75 | 1.55 | 1.62 | 1.33 | 1.35 | 1.68 |
| 18-21 years                                             | 0.65 | 0.78 | 1.03 | 1.07 | 1.08 | 1.03 | 1.05 | 1.04 | 1.06 | 1.00 | 1.06 | 1.16 |
| 22-24 years                                             | 0.54 | 0.72 | 0.75 | 0.83 | 0.80 | 0.81 | 0.86 | 0.89 | 0.85 | 0.76 | 0.72 | 0.90 |

Appendix to: Saunders NR, Toulany A, Deb B, et al. Acute mental health service use following onset of the COVID-19 pandemic in Ontario, Canada: a trend analysis. *CMAJ Open* 2021. DOI:10.9778/cmajo.20210100. Copyright © 2021 The Author(s) or their employer(s). To receive this resource in an accessible format, please contact us at [cmajgroup@cmajca](mailto:cmajgroup@cmajca).

|                                                       |      |      |      |      |      |      |      |      |      |      |      |       |
|-------------------------------------------------------|------|------|------|------|------|------|------|------|------|------|------|-------|
| 25-44 years                                           | 0.37 | 0.44 | 0.52 | 0.55 | 0.51 | 0.51 | 0.54 | 0.51 | 0.53 | 0.53 | 0.47 | 0.56  |
| 45-64 years                                           | 0.26 | 0.30 | 0.33 | 0.37 | 0.37 | 0.35 | 0.36 | 0.34 | 0.35 | 0.28 | 0.27 | 0.33  |
| 65-105 years                                          | 0.12 | 0.15 | 0.19 | 0.23 | 0.20 | 0.19 | 0.20 | 0.21 | 0.21 | 0.18 | 0.18 | 0.21  |
| <b>INTENTIONAL SELF-INJURY, PER 10,000 POPULATION</b> |      |      |      |      |      |      |      |      |      |      |      |       |
| <b>MALES</b>                                          |      |      |      |      |      |      |      |      |      |      |      |       |
| 10-13 years                                           | -    | -    | 0.21 | -    | -    | 0.33 | 0.24 | 0.24 | 0.18 | 0.21 | 0.37 | 0.33  |
| 14-17 years                                           | 1.17 | 0.96 | 1.51 | 1.95 | 1.33 | 0.93 | 1.64 | 1.76 | 1.58 | 1.53 | 1.59 | 1.68  |
| 18-21 years                                           | 1.86 | 2.59 | 2.68 | 2.38 | 2.25 | 1.83 | 1.95 | 1.92 | 2.38 | 1.66 | 1.84 | 2.15  |
| 22-24 years                                           | 1.89 | 2.00 | 2.26 | 2.63 | 1.85 | 1.85 | 1.34 | 1.93 | 1.97 | 1.69 | 1.92 | 2.52  |
| 25-44 years                                           | 1.24 | 1.40 | 1.44 | 1.60 | 1.70 | 1.50 | 1.60 | 1.55 | 1.55 | 1.43 | 1.53 | 1.65  |
| 45-64 years                                           | 0.64 | 0.79 | 0.81 | 1.02 | 0.81 | 0.89 | 0.76 | 0.87 | 0.88 | 0.78 | 0.72 | 0.80  |
| 65-105 years                                          | 0.25 | 0.31 | 0.33 | 0.44 | 0.38 | 0.40 | 0.32 | 0.33 | 0.31 | 0.34 | 0.21 | 0.33  |
| <b>FEMALES</b>                                        |      |      |      |      |      |      |      |      |      |      |      |       |
| 10-13 years                                           | 0.99 | 0.77 | 1.12 | 1.06 | 1.54 | 1.73 | 1.76 | 2.56 | 1.76 | 2.41 | 2.31 | 2.86  |
| 14-17 years                                           | 5.25 | 5.90 | 5.38 | 6.00 | 5.87 | 7.24 | 8.73 | 8.02 | 7.40 | 8.61 | 7.87 | 10.55 |
| 18-21 years                                           | 4.44 | 5.08 | 5.71 | 7.41 | 5.84 | 6.32 | 5.33 | 5.14 | 5.17 | 6.29 | 5.84 | 5.71  |
| 22-24 years                                           | 2.83 | 3.98 | 4.02 | 3.79 | 4.67 | 4.48 | 4.06 | 4.78 | 3.98 | 3.93 | 3.93 | 3.77  |
| 25-44 years                                           | 1.28 | 1.54 | 1.55 | 1.66 | 1.58 | 1.57 | 1.62 | 1.58 | 1.49 | 1.80 | 1.32 | 1.60  |
| 45-64 years                                           | 0.69 | 0.79 | 0.71 | 0.87 | 0.87 | 0.75 | 0.78 | 0.80 | 0.58 | 0.76 | 0.56 | 0.77  |
| 65-105 years                                          | 0.35 | 0.29 | 0.35 | 0.33 | 0.37 | 0.30 | 0.41 | 0.36 | 0.32 | 0.26 | 0.29 | 0.29  |

Cells with (-) have n's < 6. Institutional policy does not allow reporting for cell sizes < 6.
