# Supplementary material for: Acute mental health service use following onset of the COVID-19 pandemic in Ontario, Canada: a trend analysis
Source: PubMed Central journal article supplement — CMAJ Open. 2021 Nov 16;9(4):E988–97. doi: 10.9778/cmajo.20210100 (PMC8598241; doi:10.9778/cmajo.20210100), 2021-11-16
Supplement: open-2021-0100-original-sumbission.pdf [file open-2021-0100-original-sumbission.pdf]

1  
2  
3 **Trends in Acute Mental Health Service Use Following Onset of the COVID-19 Pandemic in**  
4  
5 **Ontario, Canada.**  
6  
7  
8  
9

10 Natasha R. Saunders MD<sup>1-6</sup>, Alene Toulany MD<sup>1-6</sup>, Bhumika Deb MPH<sup>6</sup>, Rachel Strauss MPH<sup>6</sup>,  
11  
12 Simone Vigod MD<sup>4,6,7,8</sup>, Astrid Guttman MDCM<sup>1-6</sup>, Maria Chiu PhD<sup>4,6</sup>, Anjie Huang MSc<sup>6</sup>,  
13  
14 Kinwah Fung MSc<sup>6</sup>, Simon Chen MPH<sup>6</sup>, Paul Kurdyak MD<sup>4, 7, 8,9</sup>  
15  
16  
17  
18  
19

20 **Affiliations:** <sup>1</sup>The Hospital for Sick Children, 555 University Avenue, Toronto, Canada, M5G 1X8;  
21  
22 <sup>2</sup>Department of Pediatrics, The University of Toronto, 555 University Avenue, Toronto, Canada,  
23  
24 M5G 1X8; <sup>3</sup>Child Health Evaluative Sciences, SickKids Research Institute, 686 Bay Street,  
25  
26 Toronto, Canada, M5G 0A4; <sup>4</sup>Institute of Health Policy, Management and Evaluation, The  
27  
28 University of Toronto, 155 College Street, Toronto, Canada M5T 1P8; <sup>5</sup>Edwin S.H. Leong Centre  
29  
30 for Healthy Children, University of Toronto, 555 University Avenue, Toronto, Canada, M5G 1X8;  
31  
32 <sup>6</sup>ICES, 2075 Bayview Avenue, Toronto, Canada, M4N 3M5; <sup>7</sup>Women's College Hospital and  
33  
34 Women's College Research Institute, Women's College Hospital, 76 Grenville Street, Toronto,  
35  
36 Ontario, M5S 1B2, <sup>8</sup>Department of Psychiatry, Temerty Faculty of Medicine, University of  
37  
38 Toronto, Toronto Canada <sup>9</sup>Centre for Addiction and Mental Health, 1001 Queen St. W. Toronto,  
39  
40 Canada, M6J 1H1  
41  
42  
43  
44  
45  
46  
47  
48  
49

50 **Corresponding Author:**

51  
52 Natasha Saunders, The Hospital for Sick Children, 555 University Avenue, Toronto, Ontario,  
53  
54 M5G 1X8. [Natasha.saunders@sickkids.ca](mailto:Natasha.saunders@sickkids.ca). (t) 416-813-7654 x203076, (f) 416-813-5663.  
55  
56  
57  
58  
59  
60

1  
2  
3  
4  
5  
6 **Contributors Statement:** N. Saunders, A Toulany and P Kurdyak conceptualized and designed  
7  
8 the study, analyzed and interpreted the results, drafted the initial manuscript, revised the  
9  
10 manuscript, and approved the final manuscript as submitted. B Deb and R Strauss, S Vigod, A  
11  
12 Guttman, M Chiu interpreted the results, revised the manuscript, and approved the final  
13  
14 manuscript as submitted. A Huang, K Fung, and S Chen had access to, analysed, and verified the  
15  
16 data, interpreted the results, revised the manuscript, and approved the final manuscript as  
17  
18 submitted. All authors approved the final manuscript as submitted and agree to be accountable  
19  
20 for all aspects of the work.  
21  
22  
23  
24  
25  
26  
27

28 **Financial Disclosure:** N. Saunders reports receiving an editorial honorarium from Archives of  
29  
30 Diseases in Childhood and an honorarium from M.S.I. Foundation, outside the submitted work.  
31  
32 S. Vigod reports receiving royalties from Up To Date, outside of the submitted work.  
33  
34  
35  
36  
37

38 **Conflict of Interest:** All authors have no conflicts of interest relevant to this article to disclose.  
39  
40  
41

42 **Financial Support:** This study was supported by ICES, which is funded by an annual grant from  
43  
44 the Ontario Ministry of Health (MOH). The opinions, results and conclusions reported in this  
45  
46 paper are those of the authors and are independent from the funding sources. No endorsement  
47  
48 by ICES or the Ontario MOH is intended or should be inferred. Parts of this material are based  
49  
50 on data and information compiled and provided by the Canadian Institute for Health  
51  
52  
53  
54  
55  
56  
57  
58  
59  
60

1  
2  
3 Information (CIHI). However, the analyses, conclusions, opinions and statements expressed  
4  
5 herein are those of the authors, and not necessarily those of CIHI.  
6  
7  
8  
9  
10  
11  
12

13 **Data sharing:** The dataset from this study is held securely in coded form at ICES. Data-sharing  
14  
15 agreements prohibit ICES from making the data set publicly available, but access may be  
16  
17 granted to those who meet pre-specified criteria for confidential access, available  
18  
19 at [www.ices.on.ca/DAS](http://www.ices.on.ca/DAS). The full data set creation plan and underlying analytic code are  
20  
21 available from the authors upon request, understanding that the programs may rely upon  
22  
23 coding templates or macros that are unique to ICES.  
24  
25  
26  
27  
28  
29  
30  
31  
32

33 **Word Count:** 2206  
34  
35  
36  
37  
38  
39  
40  
41  
42  
43  
44  
45  
46  
47  
48  
49  
50  
51  
52  
53  
54  
55  
56  
57  
58  
59  
60

## Abstract

### Background

The extent to which heightened distress during the COVID-19 pandemic has translated into increased levels of severe mental health outcomes is unknown. We examined trends in psychiatric presentations to acute care settings following the onset of the pandemic.

### Methods

In this population-based, repeated cross-sectional study, we examined rates of hospitalizations and emergency department (ED) visits for mental health concerns overall, by sex, age, and diagnostic grouping, and visits for intentional self-injury for all individuals 10-105 years in Ontario, Canada between January 2019, and September 30, 2020. Joinpoint regression was used to determine significant inflection points after the pandemic onset in March 2020.

### Results

Hospitalization and ED visit rates declined immediately following the pandemic onset with significant inflection points (peak overall decline 30.4% [hospitalizations] and 36.8% [ED visits] from April 2019) and returned to near pre-pandemic levels by September 2020. Compared to April 2019, visits for intentional self-injury declined by 32.9% without a significant inflection but remained below pre-pandemic levels until September 2020. The largest declines in service use were observed among youth ages 14 to 24 years (31.5-54.9% hospitalizations, 40.8-58.4% ED visits, 38.8-44.1% self-injury) and for those with substance-related (32.9%, ED visits) and mood disorders (44.1%, hospitalizations).

### Interpretation

1  
2  
3 The abrupt decline in acute mental health service use immediately following the pandemic  
4  
5 onset and return to pre-pandemic levels only for adults suggests possible distress from the  
6  
7 early phases of the pandemic has not translated into increased service utilization. Continued  
8  
9 surveillance of acute mental health service utilization is warranted.  
10  
11  
12  
13  
14  
15  
16  
17  
18  
19  
20  
21  
22  
23  
24  
25  
26  
27  
28  
29  
30  
31  
32  
33  
34  
35  
36  
37  
38  
39  
40  
41  
42  
43  
44  
45  
46  
47  
48  
49  
50  
51  
52  
53  
54  
55  
56  
57  
58  
59  
60

Confidential

## Introduction

There has been widespread concern about the mental health consequences of the COVID-19 pandemic(1). Social isolation, financial strain, school closures, and the stress of possible infection and its consequences all serve as risk factors for new onset or exacerbation of existing mental illnesses and addictions. Survey data and polling suggest that individuals are endorsing higher rates of distress, substance use, anxiety and depressive symptoms during the pandemic (2, 3). In multiple jurisdictions, early data demonstrate a universal decline in routine preventive health visits and acute care use for physical health concerns, likely driven by fear of infection risk and decreased accessibility of health services(4-6). Whether there have been changes in acute mental health and addictions-related service use is still largely unknown. One large population-based study in the United States showed that following an initial, brief decline, emergency department visits for mental health conditions and suicide attempts across all age groups increased in the first 28 weeks following the onset of the pandemic(7). Another large pediatric study in the United States showed an acute decline in mental health hospitalizations in the first three months following the onset of the pandemic compared to the decade prior(8). These contrasting data suggest there may be variation in the extent to which different age or diagnostic groups have been affected. Outside of the United States, acute mental health care utilization following the pandemic onset has not been reported at a population level, and different jurisdictions and health systems may have varying responses to the pandemic.

The objective of this study was to describe trends in acute mental health and addictions-related service use prior to and following the onset of the COVID-19 pandemic in Ontario, Canada's

1  
2  
3 most populous province. Specifically, we describe trends in mental health and addictions-  
4  
5 related emergency department (ED) visits, hospitalizations, and ED visits for intentional self-  
6  
7 injury across the lifespan.  
8  
9

## 10 11 12 **Methods**

### 13 *Study Design and Setting*

14  
15  
16 In this population-based, repeated cross-sectional study, we included all individuals between  
17  
18 the ages of 10 and 105 years living in Ontario, Canada with a valid health card and for whom  
19  
20 information on sex and age was available, between January 1, 2019, and September 30, 2020.  
21  
22  
23  
24  
25  
26  
27

### 28 *Data Sources*

29  
30 The Registered Persons Database, the central population registry file that enables linkage  
31  
32 across population-based health administrative data sets, was used to identify all Ontario  
33  
34 residents who were insured under Ontario's universal health coverage and to ascertain age and  
35  
36 sex information at the time of the acute care visit. The National Ambulatory Care Reporting  
37  
38 System was used to identify mental health or addictions-related ED visits, and the Canadian  
39  
40 Institute for Health Information's Discharge Abstract Database and Ontario Mental Health  
41  
42 Reporting System were used to capture psychiatric hospitalizations. The National Ambulatory  
43  
44 Care Reporting System and the Discharge Abstract Database use the International Statistical  
45  
46 Classification of Diseases and Related Health Problems, Tenth Revision, with Canadian  
47  
48 enhancements (ICD-10-CA), and the Ontario Mental Health Reporting System uses the  
49  
50 multiaxial Diagnostic and Statistical Manual of Mental Disorders, Fifth Edition (DSM-5). For all  
51  
52  
53  
54  
55  
56  
57  
58  
59  
60

1  
2  
3 ED visits, we only included unscheduled ED visits because in rural settings, primary care is  
4  
5 occasionally provided via the ED; such visits are coded as “scheduled” and were therefore  
6  
7 excluded. Datasets were linked using unique coded identifiers and analyzed at ICES (formerly  
8  
9 known as the Institute for Clinical Evaluative Sciences), an independent, nonprofit research  
10  
11 institute, whose legal status under Ontario’s health information privacy law allows it to collect  
12  
13 and analyze health care and demographic data without consent for health system evaluation  
14  
15 and improvement.  
16  
17  
18  
19  
20  
21

### 22 *Outcomes*

23  
24 Mental health and addictions-related ED visits and hospitalizations were ascertained through a  
25  
26 primary diagnosis of ICD-10 codes F06–F99. Any DSM-5 codes in the Ontario Mental Health  
27  
28 Reporting System, excluding 290.x and 294.x (neurocognitive disorders without mental health  
29  
30 and addictions-related diagnosis), were considered mental health or addiction hospitalizations.  
31  
32 We further classified mental health or addictions–related ED visits and hospitalizations into the  
33  
34 most common broad diagnostic categories on the basis of the primary or main diagnosis:  
35  
36 substance-related and addictive disorders, schizophrenia spectrum and psychotic disorders,  
37  
38 anxiety disorders, mood disorders, trauma and stressor-related disorders (see online appendix  
39  
40 exhibit 1 for more details). For ED visits and hospitalizations, we also ascertained visits for  
41  
42 intentional self-injury where diagnostic codes included ICD-10 codes X60–X84, Y10–Y19, and  
43  
44 Y28. Among visits to the ED for self-injury, as proxies for illness severity, we further measured  
45  
46 the proportion that resulted in a hospitalization, an intensive care unit admission, or death  
47  
48 during the index ED visit.  
49  
50  
51  
52  
53  
54  
55  
56  
57  
58  
59  
60



### *Statistical Analysis*

We calculated crude monthly rates for mental health or addictions–related ED visits and hospitalizations (per 1000 people) and ED visits for self-injury (per 10,000 people) between January 1, 2019 to September 30, 2020 overall, by sex, age, and diagnostic grouping. We used Joinpoint analysis software(9), version 4.7.0.0, to identify significant inflection points in 2020 in the time trends for overall mental health or addiction ED visits and hospitalizations, and statistical significance was tested using the Monte Carlo permutation method(9).

### **Results**

Among the 14,418,681 individuals living in Ontario, there was a decrease in mental health and addictions related ED visits in March and April 2020, followed by a rapid return to pre-pandemic rates in July 2020 (Figure 1). Rates dropped by 36.8%, from 1.66 to 1.05 visits per 1000 population in April 2020 compared to April in the year prior (Table 1). Joinpoint regression analysis revealed significant changes in slope in April 2020 and then again in July 2020 ( $p$ -value  $\leq 0.05$ ). Similarly, there was a sharp decrease of 30.4% in mental health and addictions-related hospitalizations in April 2020 (from 0.46 to 0.32 hospitalizations per 1000 in April 2019 to April 2020) and a return to pre-pandemic levels in June 2020 (joinpoint regression June 2020;  $P < 0.01$ ) (Figure 1, Table 1). The rate of ED visits for intentional self-injury dropped by 32.9% following March 2020 and returned to near pre-pandemic levels by August 2020, though the inflection point was not significant (Figure 2, Table 1). However, the proportion of ED visits for intentional self-injury that resulted in hospitalization or in intensive care unit admission or

1  
2  
3 death was lower following March 2020 and remained well below pre-pandemic levels through  
4  
5  
6 September 2020 (Figure 2).  
7

8           Although females generally had lower rates of ED visits and hospitalizations than males,  
9  
10 the patterns by sex mirrored those of the main analysis (Figure 1). For males, the rates of  
11  
12 mental health and addictions-related ED visits and hospitalizations had returned to pre-  
13  
14 pandemic levels by June 2020 whereas for females, it remained below the pre-pandemic levels  
15  
16 through July 2020.  
17  
18

19  
20           By age, the observed decrease in ED visits for April 2020 was greatest among youth  
21  
22 between the ages of 10 and 21 years, and among 14- to 21-year-olds, utilization did not return  
23  
24 to pre-pandemic levels by September 2020 (Figure 3, Table 1 and 2). For mental health and  
25  
26 addiction-related hospitalizations, among children and youth (10 to 24 years) hospitalizations  
27  
28 decreased early in the pandemic by a range of 31.5% to 68.5% (Table 1) and by September 2020  
29  
30 did not return to pre-pandemic levels (Figure 3, Table 2). Among adults aged 25 and older, the  
31  
32 rate of hospitalizations dropped by between 21.4% and 34.7% in April 2020 and returned to  
33  
34 pre-pandemic levels by June 2020. For ED visits for intentional self-injury, the greatest year over  
35  
36 year decrease was observed among 10- to 24-year-olds (30.4 to 56.4%) and rates generally  
37  
38 returned to pre-pandemic levels by July 2020.  
39  
40  
41  
42  
43

44  
45           Decreases in ED visit rates were observed across most diagnostic groups, except for  
46  
47 schizophrenia and other psychotic disorders. For these conditions, there were two significant  
48  
49 inflection points ( $p$ -value  $\leq 0.05$ ) with a decrease in March and an increase in June 2020. (Figure  
50  
51 4, Table 1). For substance-related and anxiety disorders, the visit rates returned to pre-  
52  
53 pandemic levels by September 2020, however, ED visit rates for mood disorders and trauma-  
54  
55  
56  
57  
58  
59  
60

1  
2  
3 and stressor-related disorders did not. Hospitalizations were most common for mood disorders  
4  
5 and this diagnostic group had the greatest absolute drop in hospitalization rate that, by June  
6  
7 2020, had not returned to pre-pandemic levels (Figure 4). Trauma and stressor-related  
8  
9 hospitalizations, while less common, followed a similar pattern to mood disorders. For the two  
10  
11 other most prevalent hospitalization types by diagnosis (schizophrenia spectrum and psychotic  
12  
13 disorders, substance-related and addictive disorders), the rates dropped following March 2020  
14  
15 and, by June 2020, had returned to pre-pandemic levels.  
16  
17  
18  
19  
20  
21

## 22 **Discussion**

23  
24  
25 With the onset of the COVID-19 pandemic came concerns about infection and related  
26  
27 consequences, social isolation as part of public health measures, school closures, impacts on  
28  
29 economies with related financial stress, and other factors that could contribute to increased  
30  
31 incidence of and worsening of existing mental illnesses and addictions. There has also been a  
32  
33 massive shift in the way mental health and addictions services are delivered, with a rapid  
34  
35 transition from mostly in-person to virtual care. Our study found that the rates of acute mental  
36  
37 health and addictions-related service use in the form of ED visits, hospitalizations and  
38  
39 intentional self-injury experienced a drop immediately following the onset of the pandemic and  
40  
41 related public health measures, followed by a return to pre-pandemic levels six months  
42  
43 following March 2020. Exceptions were observed among youth ages 14-24 years where rates of  
44  
45 ED visits and hospitalizations did not return to pre-pandemic levels by September 2020 and for  
46  
47 those who were either admitted to an intensive care unit or died during the ED visit following  
48  
49 intentional self-injury. The persistently low rate of hospitalizations and ICU admissions/deaths  
50  
51  
52  
53  
54  
55  
56  
57  
58  
59  
60

1  
2  
3 following the pandemic suggests that there may be a reduction in the lethality of presentations,  
4  
5 change in admission threshold, or system capacity.  
6  
7  
8  
9

10 Taken together, our findings suggest that the mental health and addictions-related concerns  
11 associated with the COVID-19 pandemic have not translated into increased ED visits,  
12 hospitalizations, or ED visits for intentional self-injury, at least in the six months following the  
13 onset of the pandemic in Ontario, Canada. The absence of increased acute mental health and  
14 addictions service use following March 2020 does not mean there has been no mental health  
15 impact of the pandemic. Indeed, the vast majority of mental health and addictions services are  
16 provided in ambulatory and community settings; there may be increased demand for  
17 ambulatory services that is not observed in our acute care-focused outcomes. Our finding of no  
18 increase in acute care use above the pre-pandemic baseline could also be due to individuals  
19 choosing to avoid using acute care services such as EDs and hospitals, as has been observed  
20 with physical health conditions(4, 5, 10-12). If true, this acute treatment avoidance could be  
21 another adverse consequence of the COVID-19 pandemic.  
22  
23  
24  
25  
26  
27  
28  
29  
30  
31  
32  
33  
34  
35  
36  
37  
38  
39

40 The factors contributing to the persistent reduction in rates of acute care use in younger  
41 populations is less clear. Adolescents have lost contact with many protective adults such as  
42 teachers, coaches, and clinicians who may notice early signs of distress and mental illness.  
43  
44 There is a substantial school-related seasonality to acute care mental health and addictions-  
45 related service use among youth, with service use dropping substantially in summer months  
46 and holidays when children are not in school. If teachers and other non-parental adults are  
47 critical to mental health and addiction-related case ascertainment amongst children and youth,  
48  
49  
50  
51  
52  
53  
54  
55  
56  
57  
58  
59  
60

1  
2  
3 the shift to virtual schooling, where students are no longer in classrooms and observed by  
4  
5 teachers or peers, may partly explain the persistent reduction in acute care utilization rates  
6  
7 following the pandemic. Whether this reflects a short-term reduction in true demand or  
8  
9 whether the school setting serves as a critical environment for recognition of distress in this  
10  
11 population is unknown. Among those who had ED visits for intentional self-injury, our finding of  
12  
13 reduced admission and, more importantly, ICU admissions or deaths may suggest a change in  
14  
15 admission threshold and/or that the lethality of intentional self-injury presentations had  
16  
17 reduced following the pandemic. Despite widespread reports of increased population wide  
18  
19 mental illness burden associated with the COVID-19 pandemic(2), our findings show no increase  
20  
21 in acute mental health or addictions-related service use following the pandemic, and, in the  
22  
23 case of youth, a persistent reduction. It is possible, and perhaps even likely, the mental health  
24  
25 effects of the pandemic may be slower to present or more chronic in nature.  
26  
27  
28  
29  
30  
31  
32  
33  
34

35 There are a number of limitations related to this study. First, we only measure trends through  
36  
37 the 'first wave' of the pandemic. It is difficult to project trends beyond the time frame of our  
38  
39 study; further monitoring will be important. Second, our diagnostic categories are based on  
40  
41 health administrative data and, as such, reflect diagnoses provided based on the routine  
42  
43 delivery of care and hospital coding, and not validated assessments. We do not report mental  
44  
45 health ambulatory care utilization where much of the purported pandemic-related need may  
46  
47 have been met. With the rapid shift to virtual modes of mental health care delivery, we  
48  
49 speculate that access to services may be adequately meeting demand and appropriately  
50  
51 supporting primary care to keep patients out of the acute care setting.  
52  
53  
54  
55  
56  
57  
58  
59  
60

1  
2  
3  
4  
5  
6 There has been justified concern about the impact of the COVID-19 pandemic on the mental  
7  
8 health of populations. In our study, we found an abrupt drop in acute mental health services  
9  
10 use immediately following the onset of the pandemic in Ontario, followed by a return to pre-  
11  
12 pandemic levels in adults and rates slightly below pre-pandemic levels in youth. Our findings  
13  
14 suggest that distress from the early phases of the pandemic has not translated into increased  
15  
16 utilization of acute mental health and addictions services in the short term. The need for  
17  
18 ongoing monitoring of acute mental health services trends, and indeed, all mental health  
19  
20 services trends, is critical as the pandemic and its expected impact on population mental health  
21  
22 continues.  
23  
24  
25  
26  
27  
28  
29  
30  
31  
32  
33  
34  
35  
36  
37  
38  
39  
40  
41  
42  
43  
44  
45  
46  
47  
48  
49  
50  
51  
52  
53  
54  
55  
56  
57  
58  
59  
60

## References

1. Galea S, Merchant RM, Lurie N. The Mental Health Consequences of COVID-19 and Physical Distancing: The Need for Prevention and Early Intervention. *JAMA Intern Med.* 2020;180(6):817-8.
2. Cost KT, Crosbie J, Anagnostou E, Birken CS, Charach A, Monga S, et al. Mostly worse, occasionally better: impact of COVID-19 pandemic on the mental health of Canadian children and adolescents. *European child & adolescent psychiatry.* 2021.
3. Mental health during COVID-19 outbreak: poll #5 of 13 in series. Canada: Health Canada; 2021 February 2021.
4. Williams TC, MacRae C, Swann OV, Haseeb H, Cunningham S, Davies P, et al. Indirect effects of the COVID-19 pandemic on paediatric healthcare use and severe disease: a retrospective national cohort study. *Arch Dis Child.* 2021.
5. Williams R, Jenkins DA, Ashcroft DM, Brown B, Campbell S, Carr MJ, et al. Diagnosis of physical and mental health conditions in primary care during the COVID-19 pandemic: a retrospective cohort study. *Lancet Public Health.* 2020;5(10):e543-e50.
6. Glazier RH, Green ME, Wu FC, Frymire E, Kopp A, Kiran T. Shifts in office and virtual primary care during the early COVID-19 pandemic in Ontario, Canada. *CMAJ : Canadian Medical Association journal = journal de l'Association medicale canadienne.* 2021;193(6):E200-E10.
7. Holland KM, Jones C, Vivolo-Kantor AM, Idaikkadar N, Zwald M, Hoots B, et al. Trends in US Emergency Department Visits for Mental Health, Overdose, and Violence Outcomes Before and During the COVID-19 Pandemic. *JAMA psychiatry.* 2021.

- 1  
2  
3 8. Pelletier JH, Rakkar J, Au AK, Fuhrman D, Clark RSB, Horvat CM. Trends in US Pediatric  
4 Hospital Admissions in 2020 Compared With the Decade Before the COVID-19 Pandemic. JAMA  
5  
6 Netw Open. 2021;4(2):e2037227.  
7
- 8  
9  
10 9. Joinpoint Trend Analysis Software: National Cancer Institute; [Available from:  
11  
12 <https://surveillance.cancer.gov/joinpoint/>  
13  
14
- 15 10. Cordoba M, Anteby R, Zager Y, Barash Y, Klang E, Nadler R, et al. The Effect of the  
16  
17 COVID-19 Outbreak on Trauma-Related Visits to a Tertiary Hospital Emergency Department. Isr  
18  
19 Med Assoc J. 2021;23(2):82-6.  
20  
21
- 22 11. Steinman M, de Sousa JHB, Tustumi F, Wolosker N. The burden of the pandemic on the  
23  
24 non-SARS-CoV-2 emergencies: A multicenter study. Am J Emerg Med. 2021;42:9-14.  
25  
26
- 27 12. Stohr E, Aksoy A, Campbell M, Al Zaidi M, Ozturk C, Vorloeper J, et al. Hospital  
28  
29 admissions during Covid-19 lock-down in Germany: Differences in discretionary and  
30  
31 unavoidable cardiovascular events. PloS one. 2020;15(11):e0242653.  
32  
33  
34  
35  
36  
37  
38  
39  
40  
41  
42  
43  
44  
45  
46  
47  
48  
49  
50  
51  
52  
53  
54  
55  
56  
57  
58  
59  
60



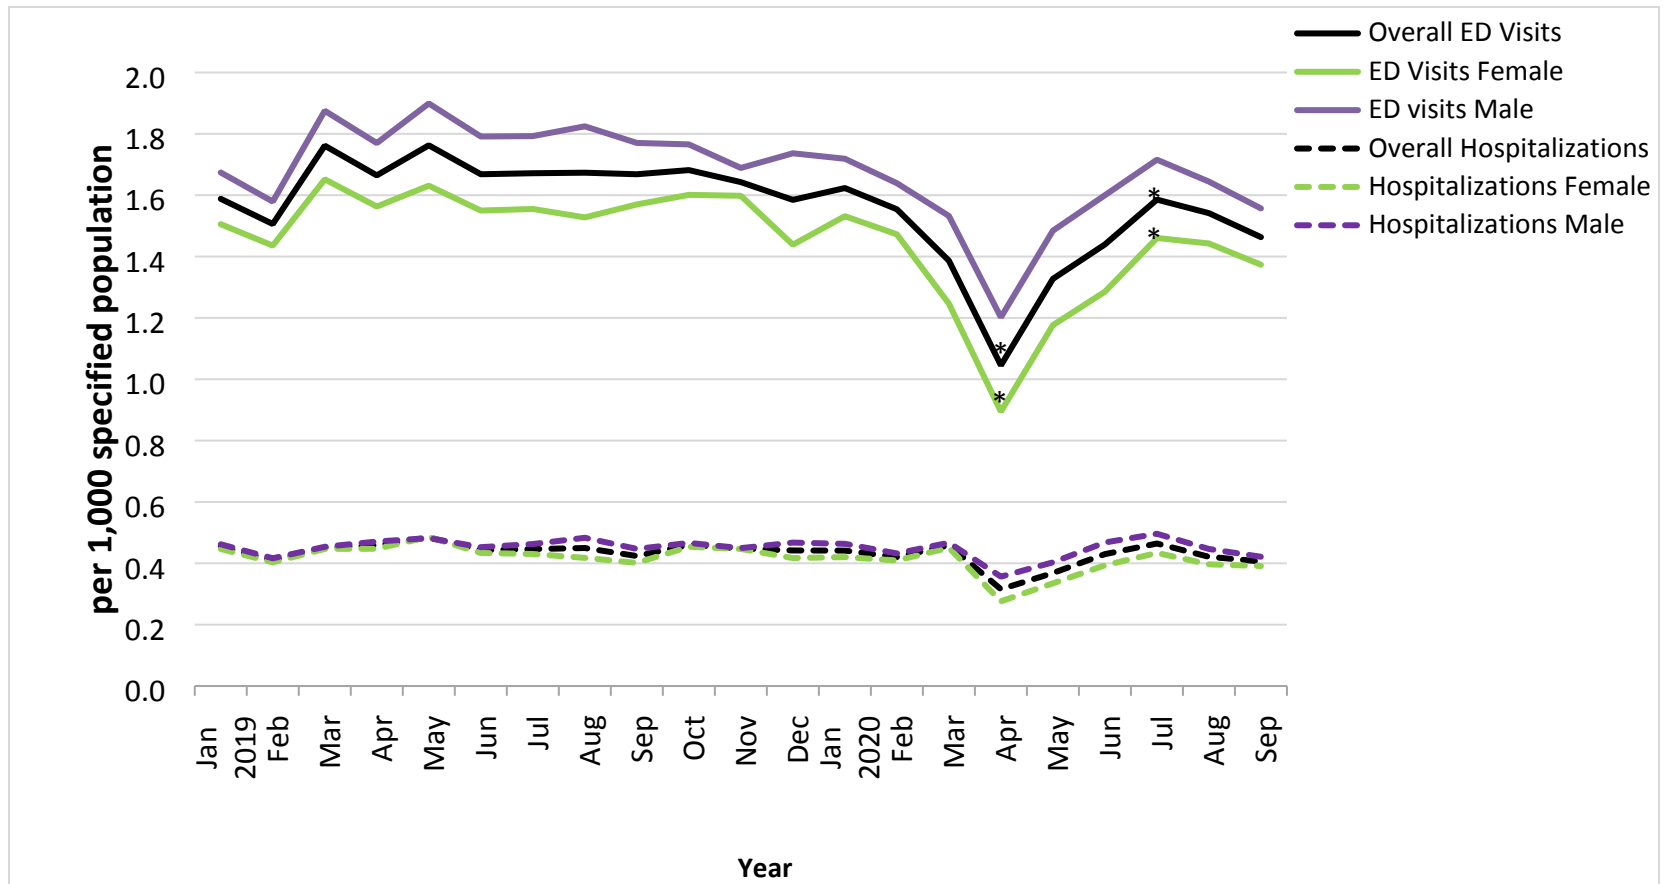

**Figure 1:** Mental health and addictions-related emergency department visits and hospitalizations per 1000 population aged 0 to 105 years.

**Caption:** Joinpoint regression analysis identified a statistically significant change in slope in April and July 2020 ( $p$ -values  $\leq 0.05$ ; indicated by \*) among overall visits to the emergency department overall and among female visits to the emergency department. A decrease in mental health and addictions-related hospitalizations was observed among both sexes in April 2020. Joinpoint regression analysis did not yield any significant changes in slope.

1  
2  
3  
4  
5  
6  
7  
8  
9  
10  
11  
12  
13  
14  
15  
16  
17  
18  
19  
20  
21  
22  
23  
24  
25  
26  
27  
28  
29  
30  
31  
32  
33  
34  
35  
36  
37  
38  
39  
40  
41  
42  
43  
44  
45  
46  
47

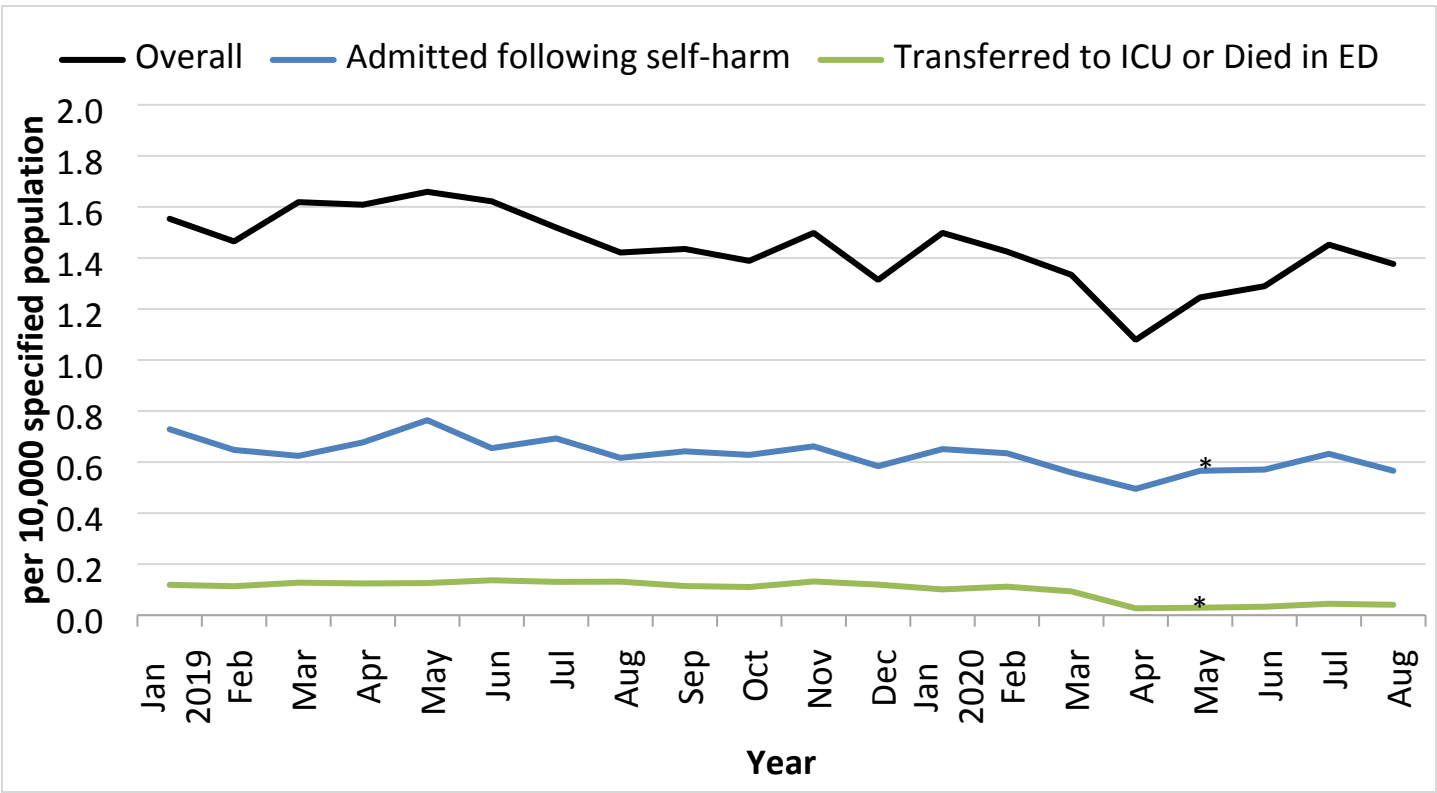

**Figure 2:** Emergency Department visits for intentional self-injury, admission rates, and ICU/death rates per 10,000 population.

**Caption:** A decrease in emergency department visits for intentional self injury was observed in April 2020 among individuals admitted following self harm and among those who were transferred to the ICU/died in the emergency department. Joinpoint regression analysis identified a statistically significant changes in slope in May 2020 (p-values  $\leq 0.05$ ; indicated by \*) among those who were transferred to ICU or died in ED.

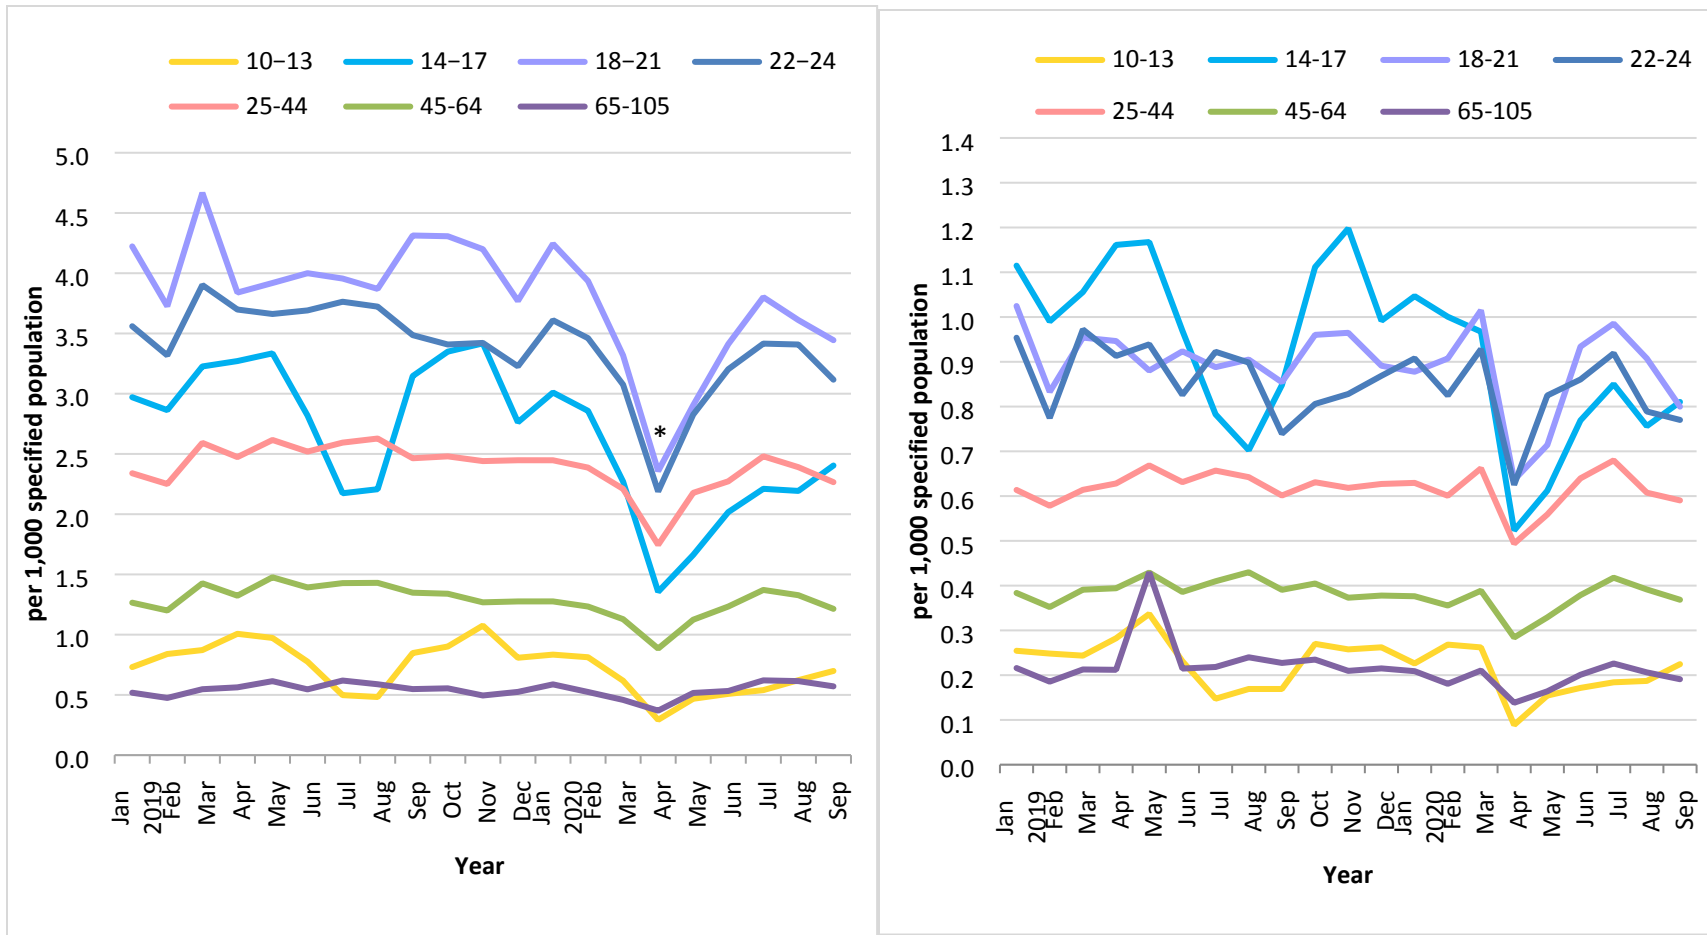

**A – Emergency Department Visits**

**B - Hospitalizations**

**Figure 3:** Mental health and addictions-related emergency department visits (A) and hospitalizations (B) per 1000 population by age.

**Caption:** For emergency department visits, joinpoint regression analysis identified a statistically significant change in slope in April 2020 ( $p$ -values  $\leq 0.05$ ; indicated by \*) among all age groups 14 to 105 years old. For hospitalizations, a decrease was observed among all age groups in April 2020. Joinpoint regression analysis did not yield any significant changes in slope.

1  
2  
3  
4  
5  
6  
7  
8  
9  
10  
11  
12  
13  
14  
15  
16  
17  
18  
19  
20  
21  
22  
23  
24  
25  
26  
27  
28  
29  
30  
31  
32  
33  
34  
35  
36  
37  
38  
39  
40  
41  
42  
43  
44  
45  
46  
47

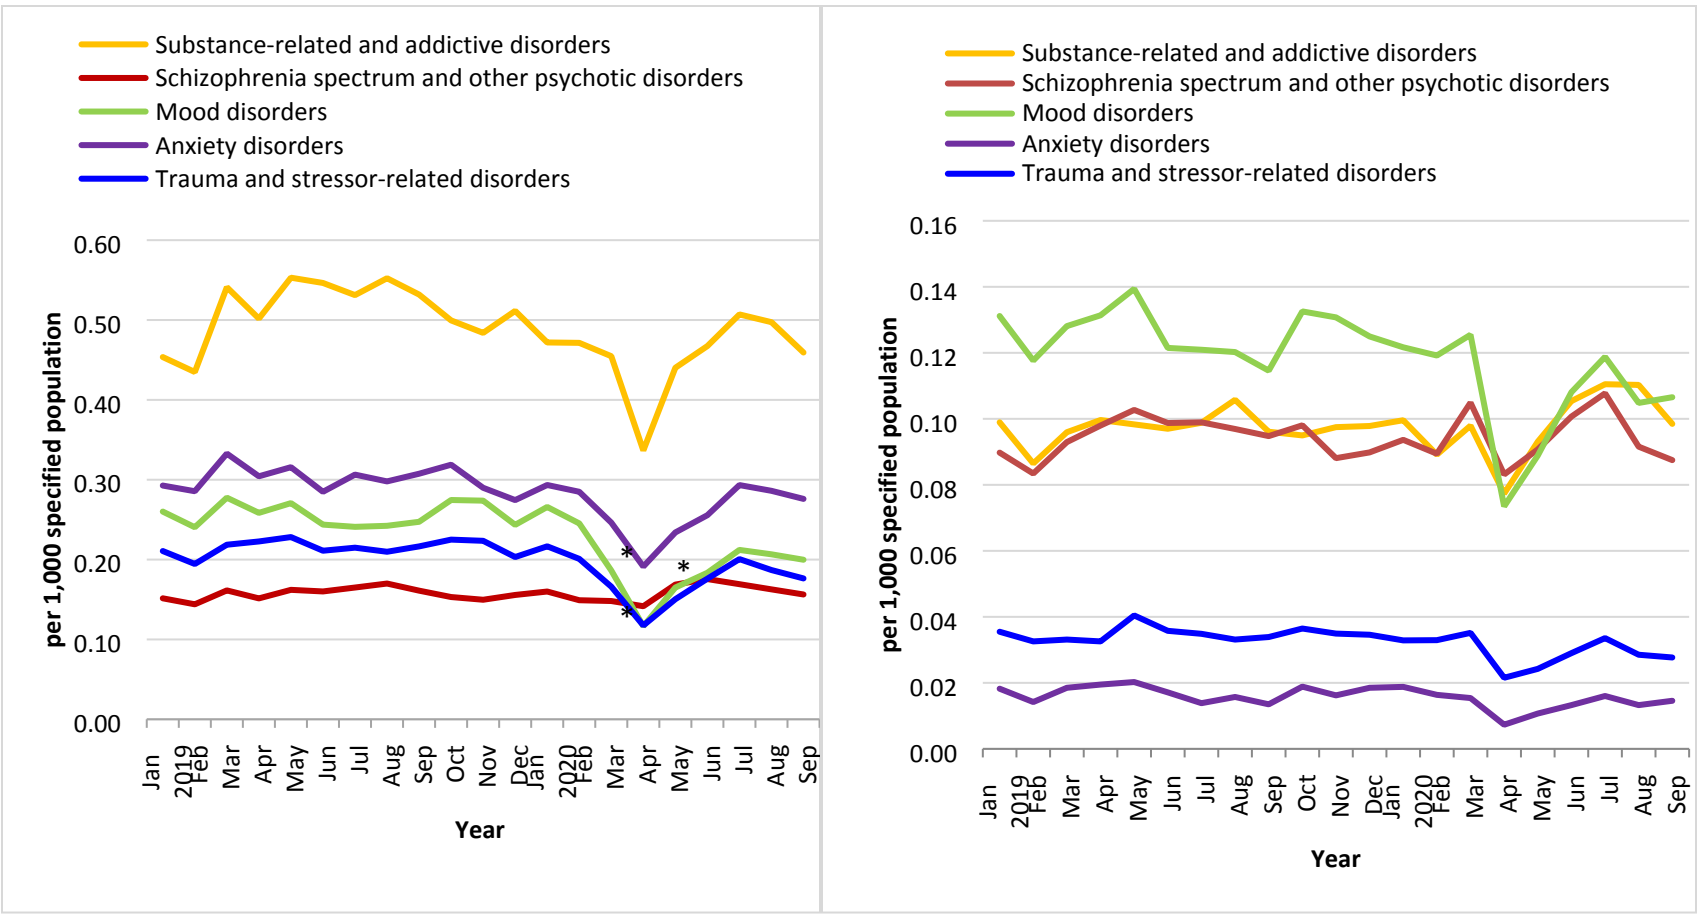

**A – Emergency Department Visits**

**B - Hospitalizations**

**Figure 4:** Mental health and addictions-related emergency department visits (A) and hospitalizations (B) per 1000 population by diagnosis.

**Caption:** Joinpoint regression analysis identified a statistically significant changes in slope in April 2020 (p-values  $\leq 0.05$ ; indicated by \*) in emergency department visits for anxiety and mood disorders. Significant changes in slope were also observed for schizophrenia in March and June 2020. For hospitalizations, a decrease in mental health and addictions-related hospitalizations was observed across all diagnostic categories in April 2020, however joinpoint regression analysis did not yield any significant changes in slope.

**Table 1:** Mean monthly number and percent relative change in mental health and addictions-related emergency department visits, hospitalizations, and intentional self-injury April 2019 to April 2020 (Ontario population 14,418,681)

|                                    | Mean monthly visits<br>(2019-2020) | Apr 2019                                 | Apr 2020 | % Relative Change |
|------------------------------------|------------------------------------|------------------------------------------|----------|-------------------|
| <b>EMERGENCY DEPARTMENT VISITS</b> |                                    |                                          |          |                   |
|                                    | <b>N</b>                           | <b>PER 1000 POPULATION, BY AGE</b>       |          |                   |
| ALL AGES                           | 22,542                             | 1.66                                     | 1.05     | -36.75            |
| 10-13 years                        | 466                                | 1.01                                     | 0.29     | -71.29            |
| 14-17 years                        | 1,660                              | 3.27                                     | 1.36     | -58.40            |
| 18-21 years                        | 2,462                              | 3.84                                     | 2.36     | -38.54            |
| 22-24 years                        | 1,820                              | 3.70                                     | 2.19     | -40.81            |
| 25-44 years                        | 9,342                              | 2.47                                     | 1.75     | -29.15            |
| 45-64 years                        | 5,098                              | 1.32                                     | 0.88     | -33.33            |
| 65-105 years                       | 1,528                              | 0.56                                     | 0.37     | -33.93            |
| <b>HOSPITALIZATIONS</b>            |                                    |                                          |          |                   |
|                                    | <b>N</b>                           | <b>PER 1000 POPULATION, BY AGE</b>       |          |                   |
| ALL AGES                           | 6,245                              | 0.46                                     | 0.32     | -30.43            |
| 10-13 years                        | 142                                | 0.28                                     | 0.09     | -68.52            |
| 14-17 years                        | 581                                | 1.16                                     | 0.52     | -54.93            |
| 18-21 years                        | 580                                | 0.95                                     | 0.64     | -32.78            |
| 22-24 years                        | 457                                | 0.91                                     | 0.63     | -31.53            |
| 25-44 years                        | 2414                               | 0.63                                     | 0.49     | -21.37            |
| 45-64 years                        | 1515                               | 0.39                                     | 0.28     | -27.91            |
| 65-105 years                       | 556                                | 0.21                                     | 0.14     | -34.72            |
| <b>INTENTIONAL SELF-INJURY</b>     |                                    |                                          |          |                   |
|                                    | <b>N</b>                           | <b>PER 10,000 POPULATION, BY AGE</b>     |          |                   |
| ALL AGES                           | 1,854                              | 1.61                                     | 1.08     | -32.91            |
| 10-13 years                        | 52                                 | 1.18                                     | 0.51     | -56.36            |
| 14-17 years                        | 272                                | 5.16                                     | 3.16     | -38.83            |
| 18-21 years                        | 283                                | 4.48                                     | 3.12     | -30.38            |
| 22-24 years                        | 171                                | 4.21                                     | 2.35     | -44.15            |
| 25-44 years                        | 636                                | 1.86                                     | 1.27     | -31.73            |
| 45-64 years                        | 346                                | 0.85                                     | 0.67     | -21.64            |
| 65-105 years                       | 94                                 | 0.36                                     | 0.30     | -16.00            |
| <b>EMERGENCY DEPARTMENT VISITS</b> |                                    |                                          |          |                   |
|                                    | <b>N</b>                           | <b>PER 1000 POPULATION, BY DIAGNOSIS</b> |          |                   |
| Substance-related and addictive    | 7,034                              | 0.50                                     | 0.34     | -32.92            |
| Schizophrenia/psychotic            | 2,277                              | 0.15                                     | 0.14     | -6.47             |
| Mood                               | 3,332                              | 0.26                                     | 0.12     | -54.89            |
| Anxiety                            | 4,099                              | 0.30                                     | 0.19     | -37.13            |
| Trauma and stressor related        | 2,862                              | 0.22                                     | 0.12     | -47.24            |
| <b>HOSPITALIZATIONS</b>            |                                    |                                          |          |                   |
|                                    | <b>N</b>                           | <b>PER 1000 POPULATION, BY DIAGNOSIS</b> |          |                   |
| Substance-related and addictive    | 1,407                              | 0.10                                     | 0.08     | -22.38            |
| Schizophrenia/psychotic            | 1,360                              | 0.10                                     | 0.08     | -15.14            |
| Mood                               | 1,702                              | 0.13                                     | 0.07     | -44.07            |
| Anxiety                            | 227                                | 0.02                                     | 0.01     | -62.43            |
| Trauma and stressor related        | 469                                | 0.03                                     | 0.02     | -33.84            |

**Table 2: Monthly rates of acute mental health care use during the COVID-19 pandemic, April to September 2020.**

| Age Strata                                              | Apr  | May  | Jun  | Jul  | Aug  | Sept |
|---------------------------------------------------------|------|------|------|------|------|------|
| <b>EMERGENCY DEPARTMENT VISITS, PER 1000 POPULATION</b> |      |      |      |      |      |      |
| 10-13 years                                             | 0.29 | 0.47 | 0.51 | 0.54 | 0.62 | 0.70 |
| 14-17 years                                             | 1.36 | 1.66 | 2.02 | 2.21 | 2.19 | 2.40 |
| 18-21 years                                             | 2.36 | 2.90 | 3.41 | 3.80 | 3.61 | 3.4  |
| 22-24 years                                             | 2.19 | 2.83 | 3.20 | 3.42 | 3.41 | 3.12 |
| 25-44 years                                             | 1.75 | 2.18 | 2.27 | 2.48 | 2.39 | 2.27 |
| 45-64 years                                             | 0.88 | 1.12 | 1.23 | 1.37 | 1.33 | 1.21 |
| 65-105 years                                            | 0.37 | 0.52 | 0.53 | 0.62 | 0.61 | 0.57 |
| <b>HOSPITALIZATIONS, PER 1000 POPULATION</b>            |      |      |      |      |      |      |
| 10-13 years                                             | 0.09 | 0.15 | 0.17 | 0.18 | 0.19 | 0.22 |
| 14-17 years                                             | 0.52 | 0.61 | 0.77 | 0.85 | 0.76 | 0.81 |
| 18-21 years                                             | 0.64 | 0.71 | 0.93 | 0.99 | 0.91 | 0.80 |
| 22-24 years                                             | 0.63 | 0.82 | 0.86 | 0.92 | 0.79 | 0.77 |
| 25-44 years                                             | 0.49 | 0.56 | 0.64 | 0.68 | 0.61 | 0.59 |
| 45-64 years                                             | 0.28 | 0.33 | 0.38 | 0.42 | 0.39 | 0.37 |
| 65-105 years                                            | 0.14 | 0.16 | 0.20 | 0.23 | 0.21 | 0.19 |
| <b>INTENTIONAL SELF-INJURY, PER 10,000 POPULATION</b>   |      |      |      |      |      |      |
| 10-13 years                                             | 0.51 | 0.41 | 0.66 | 0.59 | 0.84 | 1.01 |
| 14-17 years                                             | 3.16 | 3.39 | 3.39 | 3.92 | 3.54 | 4.03 |
| 18-21 years                                             | 3.12 | 3.80 | 4.16 | 4.85 | 3.99 | 4.05 |
| 22-24 years                                             | 2.35 | 2.98 | 3.13 | 3.20 | 3.24 | 3.16 |
| 25-44 years                                             | 1.27 | 1.47 | 1.50 | 1.63 | 1.65 | 1.55 |
| 45-64 years                                             | 0.67 | 0.79 | 0.76 | 0.94 | 0.84 | 0.81 |
| 65-105 years                                            | 0.30 | 0.30 | 0.34 | 0.38 | 0.38 | 0.34 |

## Appendix 1.

## Mental Health Diagnostic Codes and Disease Groupings

| Category                                                    | ICD-9-CM code (OMHRS)                                                                                                                         | ICD-10-CA (DAD/NACRS)                                                                                        |
|-------------------------------------------------------------|-----------------------------------------------------------------------------------------------------------------------------------------------|--------------------------------------------------------------------------------------------------------------|
| <b>Any mental health and addictions</b>                     | Any OMHRS record (including missing, except for 290.x, 294.x in primary diagnosis). Excluded if primary diagnosis missing and provisional=17. | A primary diagnosis of F06-F99 any diagnosis X60-X84, Y10-Y19, Y28 when the primary diagnosis is not F06-F99 |
| <b>Substance-Related and Addictive Disorders</b>            | 291.x (all 291 codes), 292.x (all 292 codes), 303.x (all 303 codes), 304.x (all 304 codes), 305.x. Provisional=16                             | A primary diagnosis of F10-19, F55                                                                           |
| <b>Schizophrenia Spectrum and Other Psychotic Disorders</b> | 293.81/82, 295.x (all 295 codes), 297.x (all 297 codes), 298.x (all 298 codes). Provisional=2                                                 | A primary diagnosis of F06.0-2, F20, F22-F29, F53.1                                                          |
| <b>Mood disorders</b>                                       | 293.83, 296.x (all 296 codes), 300.4x, 301.13, 311.x, 625.4. Provisional=3, 4                                                                 | A primary diagnosis of F06.3, F30.x-F34.x, F38.x, F39.x, F53.0                                               |
| <b>Anxiety disorders</b>                                    | 293.84, 300, 300.0x, 300.2x, 309.21, 313.23. Provisional=5                                                                                    | A primary diagnosis of F06.4, F40, F41, F93.0-2, F94.0                                                       |
| <b>Trauma/stressor-related disorders</b>                    | 308.3x, 309, 309.0x, 309.24, 309.28, 309.3x, 309.4x, 309.81, 309.89, 309.9x, 313.89. Provisional=7                                            | A primary diagnosis of F43.x, F94.1, F94.2                                                                   |
| <b>OCD &amp; related disorders</b>                          | 300.3x, 300.7x, 312.39, 698.4x. Provisional=6                                                                                                 | A primary diagnosis of F42.x, F45.2, F63.3                                                                   |
| <b>Personality disorders</b>                                | 301, 301.0x, 301.2x, 301.4x, 301.5x, 301.6x, 301.7x, 301.81-3, 301.89, 301.9x 310.1. Provisional=18                                           | A primary diagnosis of F07.x (all F07 codes), F21, F60, F61, F62, F68, F69                                   |
| <b>Intentional self-injury</b>                              | N/A (DAD/NACRS only)                                                                                                                          | A secondary diagnosis of X60-X84, Y10-Y19, Y28 when the primary diagnosis is not F06-F99                     |

OMHRS=Ontario Mental Health Reporting System, DAD=Discharge Abstract Database, NACRS=National Ambulatory Care Reporting System, OCD=obsessive compulsive disorder, ICD-9-CM=International Classification of Diseases, 9<sup>th</sup> Revision, clinical modification, ICD-10-CA=International Classification of Diseases, 10<sup>th</sup> Revision, with Canadian enhancements

1  
2  
3  
4  
5  
6  
7  
8  
9  
10  
11  
12  
13  
14  
15  
16  
17  
18  
19  
20  
21  
22  
23  
24  
25  
26  
27  
28  
29  
30  
31  
32  
33  
34  
35  
36  
37  
38  
39  
40  
41  
42  
43  
44  
45  
46  
47  
48  
49  
50  
51  
52  
53  
54  
55  
56  
57  
58  
59  
60STROBE Statement—Checklist of items that should be included in reports of *cross-sectional studies*

|                              | Item No | Recommendation                                                                                                                                                                                               | Page No |
|------------------------------|---------|--------------------------------------------------------------------------------------------------------------------------------------------------------------------------------------------------------------|---------|
| <b>Title and abstract</b>    | 1       | (a) Indicate the study's design with a commonly used term in the title or the abstract                                                                                                                       | 1, 4    |
|                              |         | (b) Provide in the abstract an informative and balanced summary of what was done and what was found                                                                                                          | 4       |
| <b>Introduction</b>          |         |                                                                                                                                                                                                              |         |
| Background/rationale         | 2       | Explain the scientific background and rationale for the investigation being reported                                                                                                                         | 6       |
| Objectives                   | 3       | State specific objectives, including any prespecified hypotheses                                                                                                                                             | 6, 7    |
| <b>Methods</b>               |         |                                                                                                                                                                                                              |         |
| Study design                 | 4       | Present key elements of study design early in the paper                                                                                                                                                      | 7       |
| Setting                      | 5       | Describe the setting, locations, and relevant dates, including periods of recruitment, exposure, follow-up, and data collection                                                                              | 7       |
| Participants                 | 6       | (a) Give the eligibility criteria, and the sources and methods of selection of participants                                                                                                                  | 7       |
| Variables                    | 7       | Clearly define all outcomes, exposures, predictors, potential confounders, and effect modifiers. Give diagnostic criteria, if applicable                                                                     | 8       |
| Data sources/<br>measurement | 8*      | For each variable of interest, give sources of data and details of methods of assessment (measurement). Describe comparability of assessment methods if there is more than one group                         | 7,8     |
| Bias                         | 9       | Describe any efforts to address potential sources of bias                                                                                                                                                    | 9       |
| Study size                   | 10      | Explain how the study size was arrived at                                                                                                                                                                    | 9       |
| Quantitative variables       | 11      | Explain how quantitative variables were handled in the analyses. If applicable, describe which groupings were chosen and why                                                                                 | 8       |
| Statistical methods          | 12      | (a) Describe all statistical methods, including those used to control for confounding                                                                                                                        | 9       |
|                              |         | (b) Describe any methods used to examine subgroups and interactions                                                                                                                                          | 9       |
|                              |         | (c) Explain how missing data were addressed                                                                                                                                                                  | na      |
|                              |         | (d) If applicable, describe analytical methods taking account of sampling strategy                                                                                                                           | na      |
|                              |         | (e) Describe any sensitivity analyses                                                                                                                                                                        | na      |
| <b>Results</b>               |         |                                                                                                                                                                                                              |         |
| Participants                 | 13*     | (a) Report numbers of individuals at each stage of study—eg numbers potentially eligible, examined for eligibility, confirmed eligible, included in the study, completing follow-up, and analysed            | 9       |
|                              |         | (b) Give reasons for non-participation at each stage                                                                                                                                                         | na      |
|                              |         | (c) Consider use of a flow diagram                                                                                                                                                                           | na      |
| Descriptive data             | 14*     | (a) Give characteristics of study participants (eg demographic, clinical, social) and information on exposures and potential confounders                                                                     | 7, 9    |
|                              |         | (b) Indicate number of participants with missing data for each variable of interest                                                                                                                          | na      |
| Outcome data                 | 15*     | Report numbers of outcome events or summary measures                                                                                                                                                         | 9-11    |
| Main results                 | 16      | (a) Give unadjusted estimates and, if applicable, confounder-adjusted estimates and their precision (eg, 95% confidence interval). Make clear which confounders were adjusted for and why they were included | 9-11    |



|                          |    |                                                                                                                                                                            |       |
|--------------------------|----|----------------------------------------------------------------------------------------------------------------------------------------------------------------------------|-------|
|                          |    | (b) Report category boundaries when continuous variables were categorized                                                                                                  | na    |
|                          |    | (c) If relevant, consider translating estimates of relative risk into absolute risk for a meaningful time period                                                           | na    |
| Other analyses           | 17 | Report other analyses done—eg analyses of subgroups and interactions, and sensitivity analyses                                                                             | na    |
| <b>Discussion</b>        |    |                                                                                                                                                                            |       |
| Key results              | 18 | Summarise key results with reference to study objectives                                                                                                                   | 11-12 |
| Limitations              | 19 | Discuss limitations of the study, taking into account sources of potential bias or imprecision. Discuss both direction and magnitude of any potential bias                 | 13    |
| Interpretation           | 20 | Give a cautious overall interpretation of results considering objectives, limitations, multiplicity of analyses, results from similar studies, and other relevant evidence | 11-12 |
| Generalisability         | 21 | Discuss the generalisability (external validity) of the study results                                                                                                      | 14    |
| <b>Other information</b> |    |                                                                                                                                                                            |       |
| Funding                  | 22 | Give the source of funding and the role of the funders for the present study and, if applicable, for the original study on which the present article is based              | 2     |

\*Give information separately for exposed and unexposed groups.

**Note:** An Explanation and Elaboration article discusses each checklist item and gives methodological background and published examples of transparent reporting. The STROBE checklist is best used in conjunction with this article (freely available on the Web sites of PLoS Medicine at <http://www.plosmedicine.org/>, Annals of Internal Medicine at <http://www.annals.org/>, and Epidemiology at <http://www.epidem.com/>). Information on the STROBE Initiative is available at [www.strobe-statement.org](http://www.strobe-statement.org).
